# Supplementary material
Source: Springer Nature journal article supplement (https://www.springermedizin.de/resource/supplementary/12888_2010_840_MOESM1_ESM.pdf/9478948)
Supplement: MOESM1 [file 9478948]

Figure 1. Flowchart: recruitment of 304 eligible patients with myocardial infarction

n=951 patients with index MI and meeting inclusion criteria approached

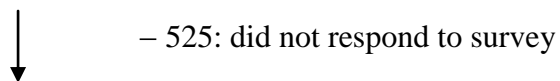

n=426 returned NRS asking for fear of dying, helplessness, and pain perceived during MI

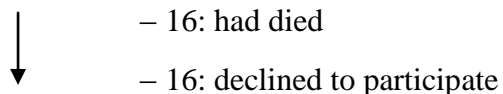

n=394 consented to participate in the follow-up investigation

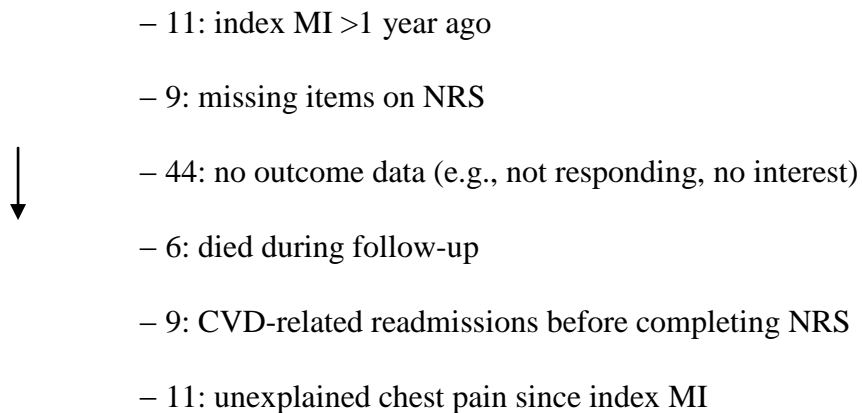

n=304 available for follow-up investigation

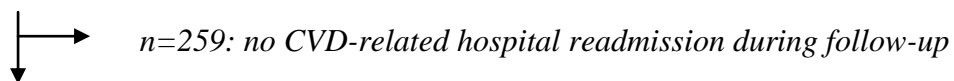

n=45 hospital readmissions because of CVD-related events

12 recurrent MI

12 non-elective PCI with stent implantation

10 elective PCI with stent implantation

4 coronary artery bypass graft

2 pace-maker implantation

5 cerebrovascular events
